# Supplementary material for: Assembly of Na3V2(PO4)2F3@C nanoparticles in reduced graphene oxide enabling superior Na+ storage for symmetric sodium batteries
Source: Royal Society of Chemistry journal article supplement (doi:10.1039/c7ra13441j), 2018-01-01
Supplement: c7ra13441j1.pdf [file c7ra13441j1.pdf]

**Assembly of  $\text{Na}_3\text{V}_2(\text{PO}_4)_2\text{F}_3$ @C Nanoparticles in Reduced  
Graphene Oxide Enabling Superior  $\text{Na}^+$  Storage for Symmetric  
Sodium Batteries**

Ye Yao,<sup>a</sup> Lu Zhang,<sup>a</sup> Yu Gao<sup>\*a</sup>, Gang Chen,<sup>a</sup> Chunzhong Wang<sup>a</sup> and Fei Du<sup>\*a</sup>

Key Laboratory of Physics and Technology for Advanced Batteries (Ministry of Education), State Key Laboratory of Superhard Materials, College of Physics, Jilin University, Changchun, 130012, People's Republic of China

Email: [dufei@jlu.edu.cn](mailto:dufei@jlu.edu.cn); [gaoyu@jlu.edu.cn](mailto:gaoyu@jlu.edu.cn)

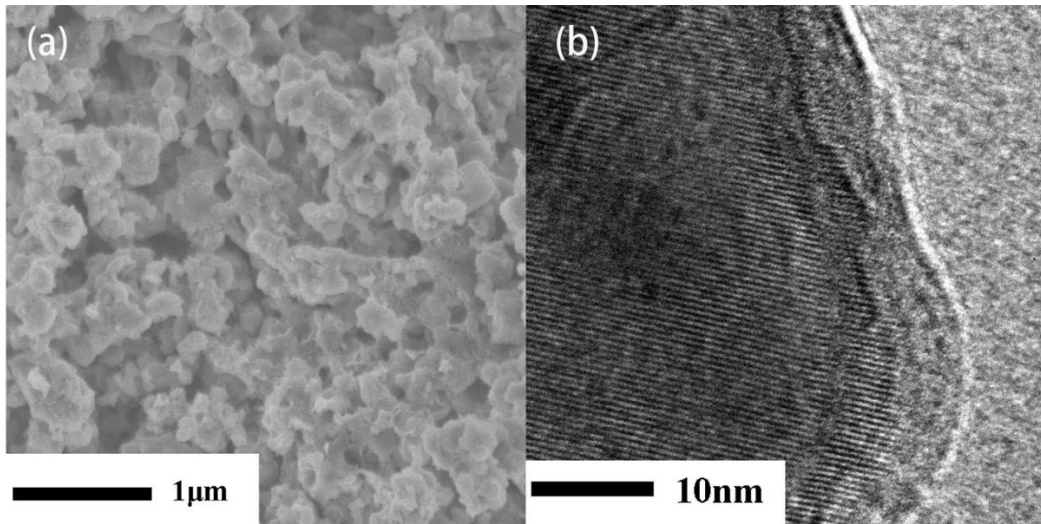

**Figure S1.** SEM (a) and TEM (b) of NVPF@C

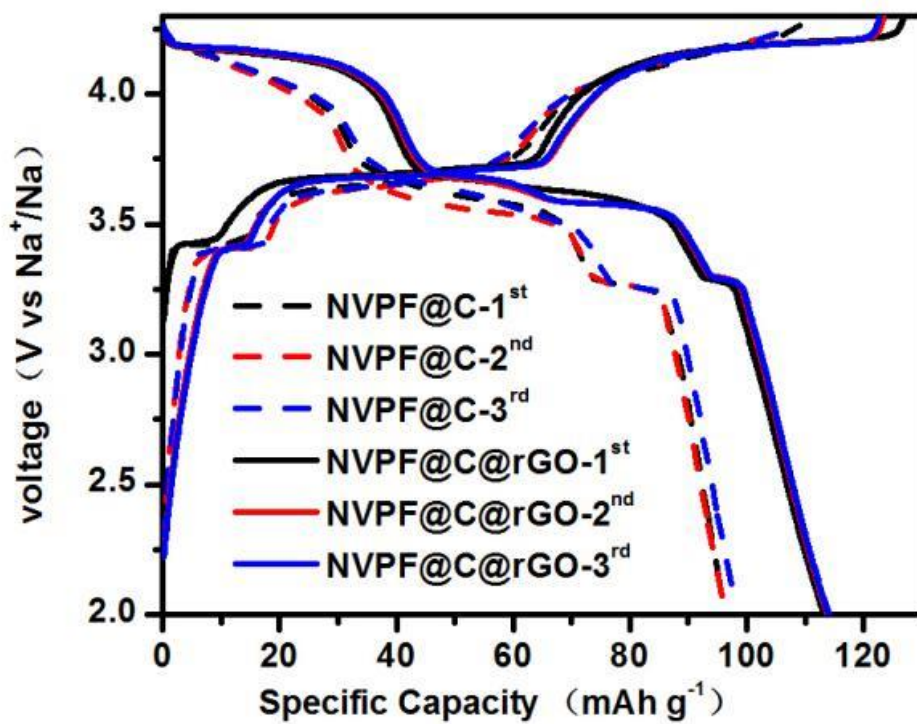

**Figure S2.** Charge-discharge profiles of the NVPF@C and NVPF@C@rGO.

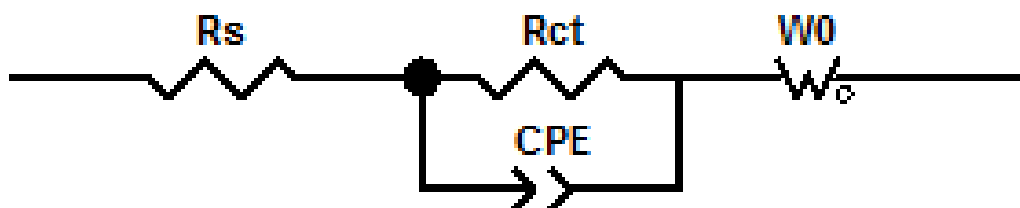

**Figure S3.** Equivalent circuit for the Nyquist plots of the NVPF@C and NVPF@C@rGO.

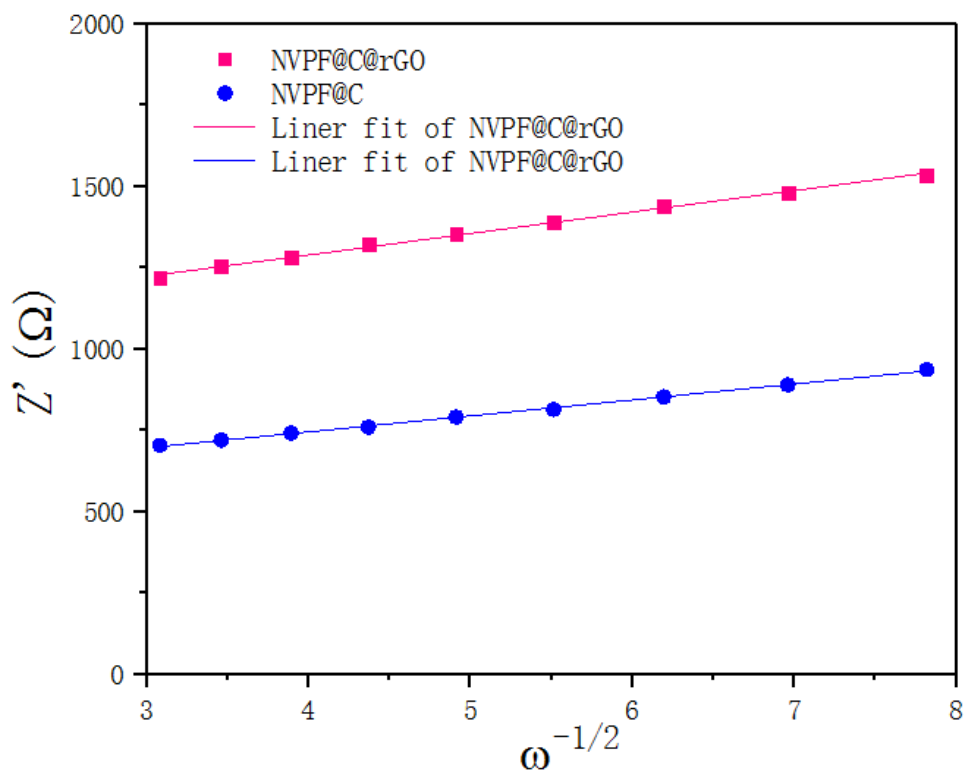

**Figure S4.** Linear fitting of  $Z'$  vs.  $\omega^{-1/2}$  of NVPF@C and NVPF@C@rGO.

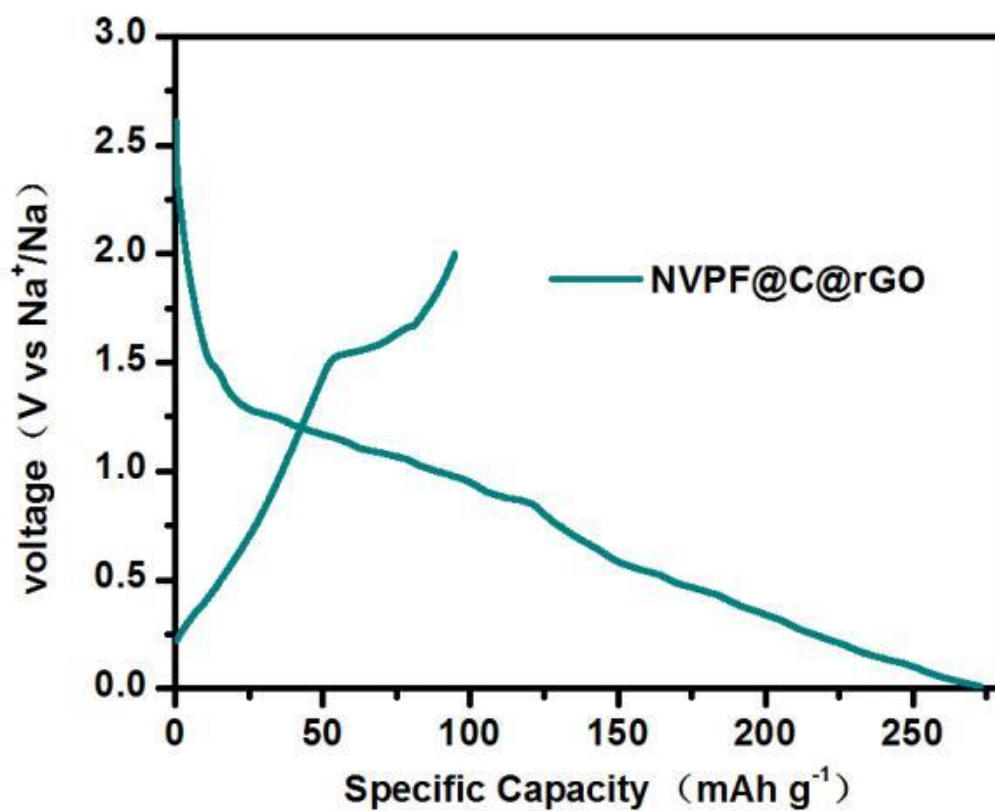

**Figure S5.** Charge-discharge profile of NVPF@C@rGO in the voltage range of 0.01-2.0V at 1C rate.

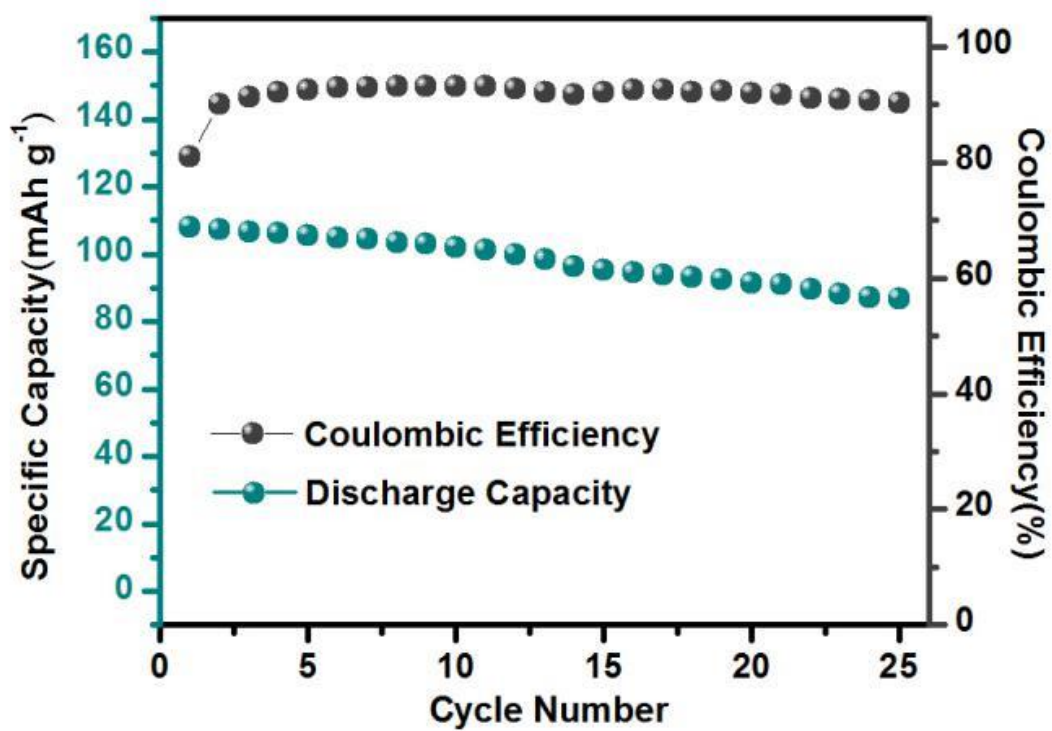

**Figure S6.** Cycle performance of NVPF@C@rGO symmetric full cell at 1C.
